# Supplementary material for: A chiral interpenetrating polymer network constructed by helical substituted polyacetylenes and used for glucose adsorption
Source: Royal Society of Chemistry journal article supplement (doi:10.1039/c7py00025a), 2017-01-01
Supplement: c7py00025a1.pdf [file c7py00025a1.pdf]

Supporting Information

# Chiral Interpenetrating Polymer Network Constructed by Helical Substituted Polyacetylenes and Used for Glucose Adsorption

*Junya Liang and Jianping Deng\**

State Key Laboratory of Chemical Resource Engineering, College of Materials Science and  
Engineering, Beijing University of Chemical Technology, Beijing 100029, China

E-mail: dengjp@mail.buct.edu.cn

### Swelling ratio of polyHIPE in THF

To analyze the swelling ratio of the obtained polyHIPEs, a polyHIPE of known weight ( $m_0$ ) was placed in a dialysis bag and immersed in THF at 0 °C. When the adsorption reached equilibrium, the wet polyHIPE was taken out and drained for 1 min until no residual droplet was left on the surface. The weight was marked as  $m_{eq}$ . The swelling ratio was calculated by the following equation, swelling ratio =  $(m_{eq}-m_0)/m_0$ . The dried polyHIPE was subjected to the above process for 5 times.

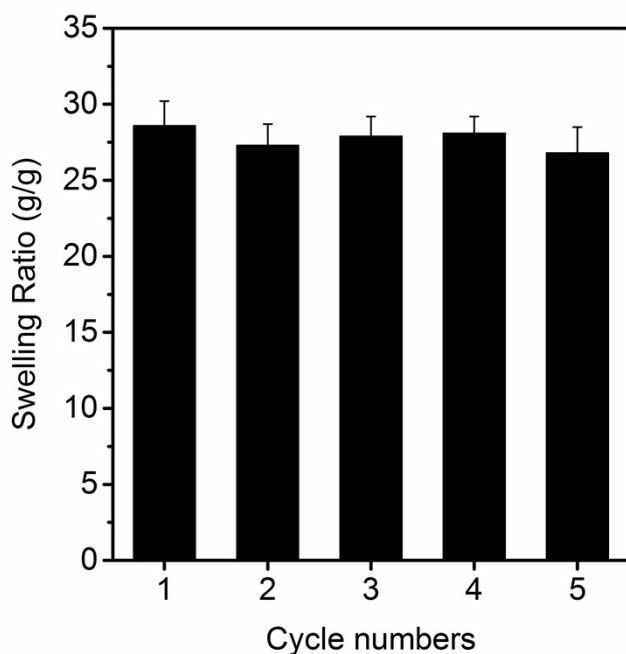

**Figure S1.** Swelling ratio of the polyHIPE in THF at 0 °C for five times.

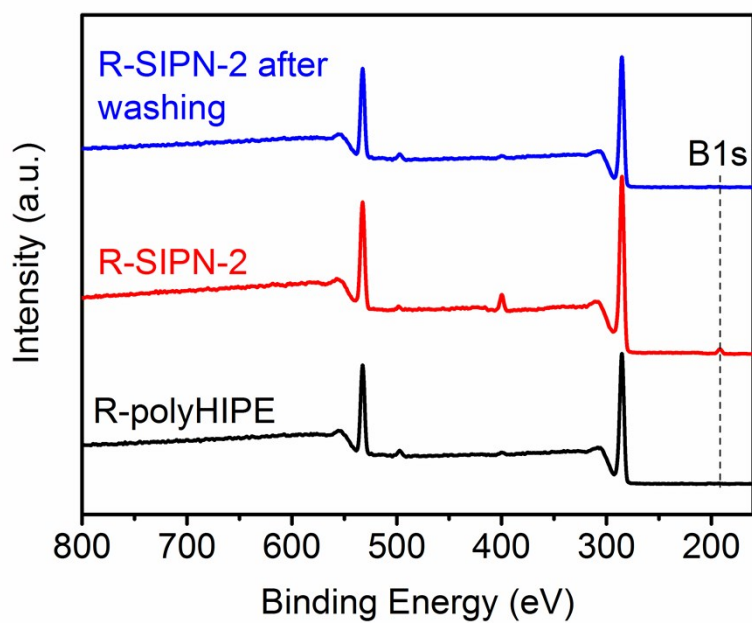

**Figure S2.** XPS spectra of R-polyHIPE, R-SIPN-2, and R-SIPN-2 after washing.

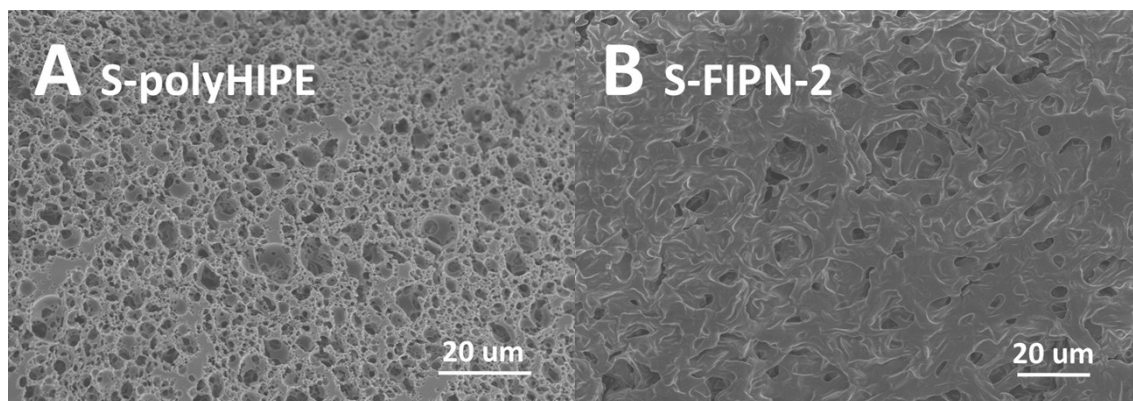

**Figure S3.** SEM images of (A) S-polyHIPE, and (B) S-FIPN-2.

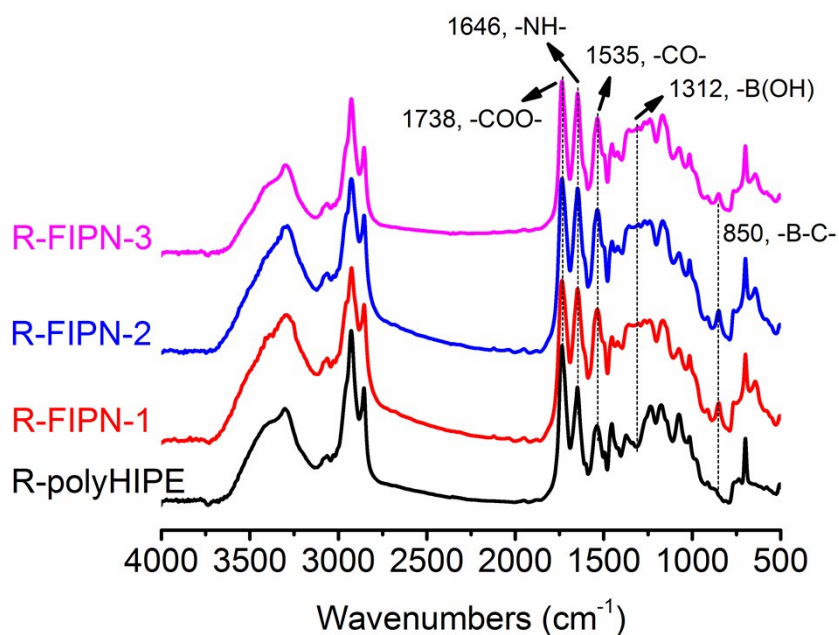

**Figure S4.** FT-IR spectra of R-polyHIPE, R-FIPN-1, R-FIPN-2, and R-FIPN-3 (in KBr Tablet).

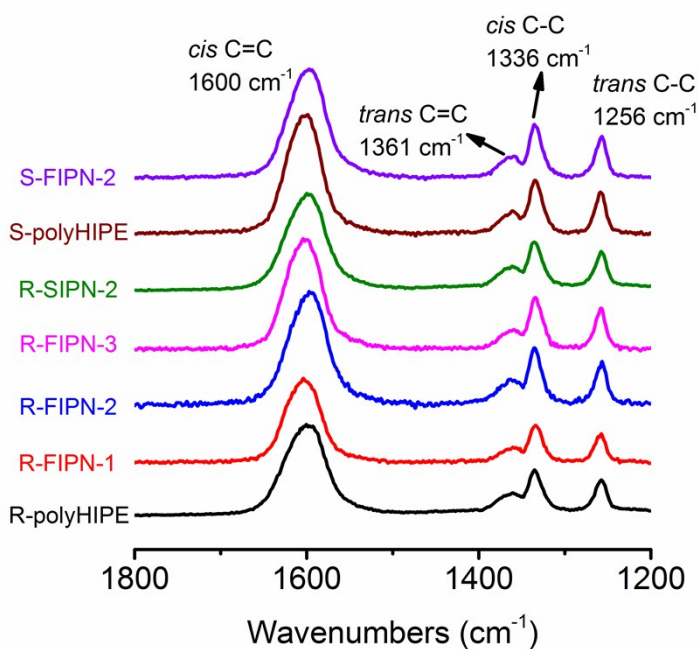

**Figure S5.** Raman spectra of polyHIPEs and IPNs (with an excitation wavelength of 785 nm).

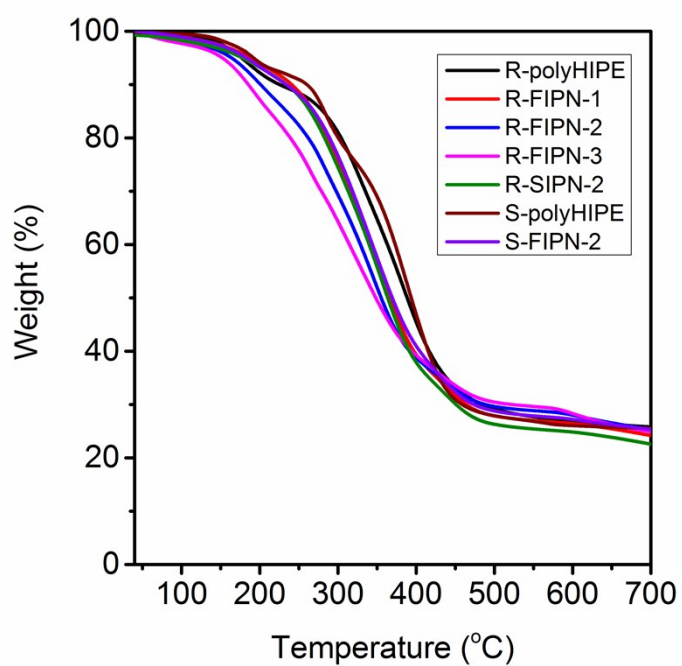

**Figure S6.** TGA curves of polyHIPEs and IPNs. Heating at 10 °C/min in nitrogen atmosphere.
